# Supplementary material for: Cooperative transport by flocking phototactic micromotors
Source: Royal Society of Chemistry journal article supplement (doi:10.1039/d1na00641j), 2021-01-01
Supplement: d1na00641j1.pdf [file d1na00641j1.pdf]

Electronic Supplementary Material (ESI) for Nanoscale.

This journal is © The Royal Society of Chemistry 2019

## Supporting Information

### Cooperative transport by flocking phototactic micromotors

Jianhua Zhang,<sup>ab</sup> Fangzhi Mou,<sup>\*a</sup> Zhen Wu,<sup>a</sup> Jiaqi Song,<sup>b</sup> Joshua E. Kauffman,<sup>b</sup> Ayusman Sen<sup>b</sup> and  
Jianguo Guan<sup>a</sup>

<sup>a</sup>State Key Laboratory of Advanced Technology for Materials Synthesis and Processing, International School of Materials Science and Engineering, Wuhan University of Technology, 122 Luoshi Road, Wuhan 430070, China. E-mail: moufz@whut.edu.cn

<sup>b</sup>Department of Chemistry, The Pennsylvania State University, University Park, PA 16802, USA

## Supporting Figures

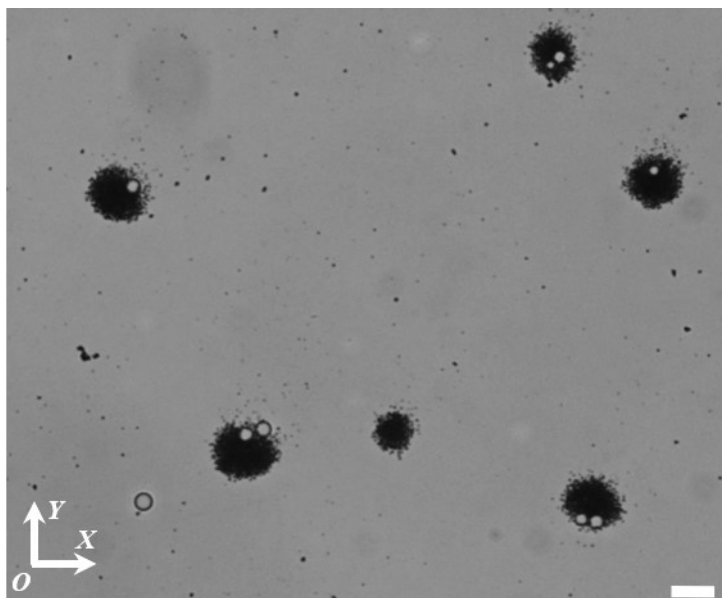

Figure S1. The microscope image of the TiO<sub>2</sub>-MFs loaded with cargoes (SiO<sub>2</sub> microspheres, average diameter: 10  $\mu\text{m}$ ). Scale bar: 20  $\mu\text{m}$ .

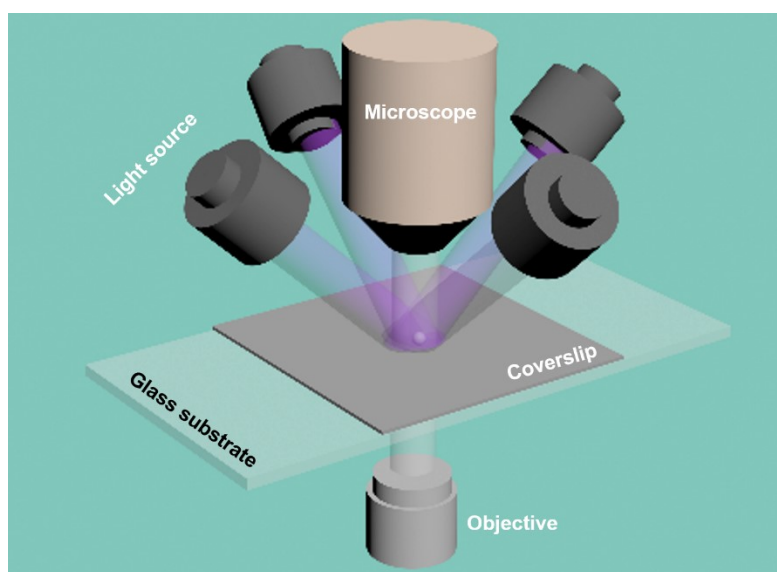

Figure S2. Schematic diagram of the experimental setup.

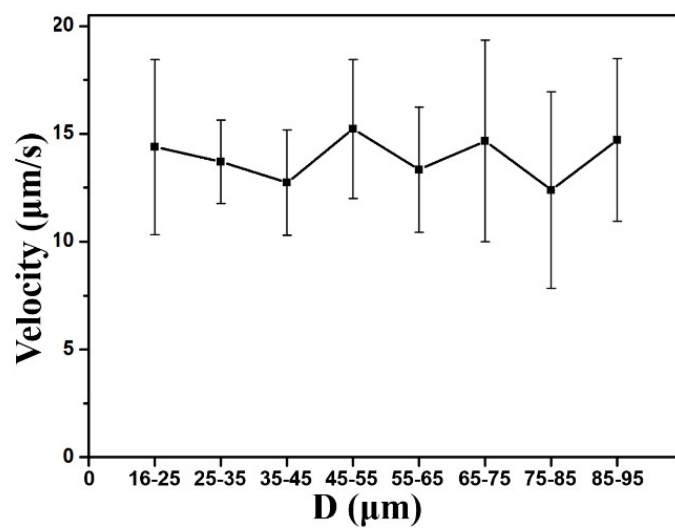

Figure S3. The average motion velocity of TiO<sub>2</sub>-MFs *versus* various diameters (*D*) under the constant condition of UV intensity (500 mW cm<sup>-2</sup>) and H<sub>2</sub>O<sub>2</sub> concentration (0.25 wt.%).

## Supporting Videos

**Video 1:** The autonomous swarming of a large SiO<sub>2</sub> microsphere and concentrated TiO<sub>2</sub> micromotors near the glass substrate in H<sub>2</sub>O<sub>2</sub> aqueous solution (0.25 wt.%).

**Video 2:** Light-controlled, on-the-fly loading of a large SiO<sub>2</sub> microsphere (10 μm) by optically controlling a TiO<sub>2</sub>-MF, with light intensity of 500 mW cm<sup>-2</sup> and in 0.25 wt% H<sub>2</sub>O<sub>2</sub>.

**Video 3:** Light-controlled cooperative transport of a large SiO<sub>2</sub> microsphere by optically controlling a TiO<sub>2</sub>-MF, with light intensity of 500 mW cm<sup>-2</sup> and in 0.25 wt% H<sub>2</sub>O<sub>2</sub>.

**Video 4:** Light-controlled cooperative transport of two and nine SiO<sub>2</sub> microspheres by optically controlling the TiO<sub>2</sub>-MFs, with light intensity of 500 mW cm<sup>-2</sup> and in 0.25 wt% H<sub>2</sub>O<sub>2</sub>.

**Video 5:** Light-controlled cooperative transport of a large amino-polystyrene microsphere, a large carboxyl-polystyrene microsphere, and perfluorooctane droplets by optically controlling the TiO<sub>2</sub>-MF, with light intensity of 500 mW cm<sup>-2</sup> and in 0.25 wt% H<sub>2</sub>O<sub>2</sub>.

**Video 6:** Light-controlled unloading of a large SiO<sub>2</sub> microsphere from the inside of a TiO<sub>2</sub>-MF, with light intensity of 500 mW cm<sup>-2</sup> and in 0.25 wt% H<sub>2</sub>O<sub>2</sub>.

**Video 7:** Light-controlled unloading of an amino-polystyrene microsphere from the outside of a TiO<sub>2</sub>-MF, with light intensity of 500 mW cm<sup>-2</sup> and in 0.25 wt% H<sub>2</sub>O<sub>2</sub>.

**Video 8:** Light-controlled collective cooperative transport of three large SiO<sub>2</sub> microspheres in a microchannel, with light intensity of 500 mW cm<sup>-2</sup> and in 0.25 wt% H<sub>2</sub>O<sub>2</sub>.

## Governing equations for numerical simulation.

Upon UV illumination, the prepared TiO<sub>2</sub> micromotors will initiate photocatalytic decomposition of hydrogen peroxide and produce amounts of O<sub>2</sub> molecules. The concentration gradients of O<sub>2</sub> molecules contributing for nonelectrolyte diffusiophoresis were simulated using the diffusions and creeping flow modules of commercial COMSOL Multiphysics package. The distribution of O<sub>2</sub> molecules is governed by the diffusion and convection of O<sub>2</sub> flux ( $J_{O_2}$ ) (Equation 1). In our model, it is solved with the conservation equation (Equation 2) at steady state.<sup>1,2</sup>

$$J_{O_2} = uc_{O_2} - D_{O_2} \nabla c_{O_2} - \frac{z_{O_2} F D_{O_2} c_{O_2} \nabla \varphi}{RT} \quad (1)$$

$$\nabla \cdot J_{O_2} = 0 = u \cdot \nabla c_{O_2} - D_{O_2} \nabla^2 c_{O_2} - \frac{z_{O_2} F D_{O_2} \nabla \cdot (c_{O_2} \nabla \varphi)}{RT} \quad (2)$$

Of which,  $u$  is the fluid velocity,  $F$  is the Faraday constant,  $\varphi$  is the electrostatic potential,  $R$  is the gas constant,  $T$  is the absolute temperature,  $c_{O_2}$ ,  $D_{O_2}$ , and  $z_{O_2}$  represent the concentration, diffusion coefficient and charge of O<sub>2</sub> molecules in water, respectively. In addition, the inertial effect is neglected, the fluid is treated as incompressible, and initial values of the flow velocity and the pressure are all zero in the present study.

## References

- 1 J. Zhang, J. Song, F. Mou, J. Guan and A. Sen, *Trends Chem.*, 2021, **3**, 387.
- 2 H. Xu, M. Medina-Sanchez and O. G. Schmidt, *Angew. Chem. Int. Ed.*, 2020, **59**, 15029.
